# Supplementary material for: Spindle assembly checkpoint strength is linked to cell fate in the Caenorhabditis elegans embryo
Source: PubMed Central journal article supplement — Mol Biol Cell. 2018 Jun 15;29(12):1435–48. doi: 10.1091/mbc.E18-04-0215 (PMC6014101; doi:10.1091/mbc.e18-04-0215), 2018-06-15
Supplement: mbc-29-1435-s001.pdf [file mbc-29-1435-s001.pdf]

# Supplemental Materials

*Molecular Biology of the Cell*

Gerhold et al.

**Figure S1**

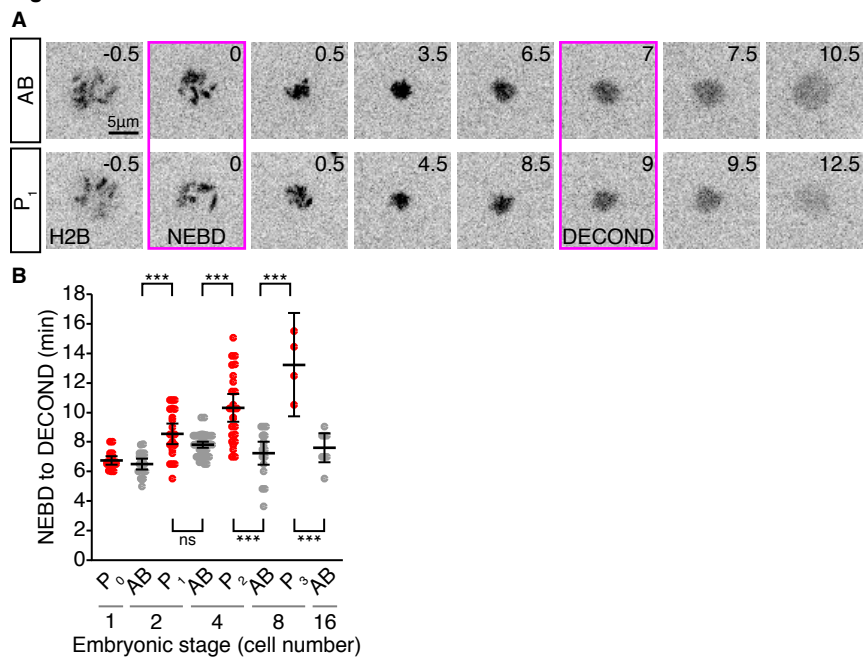

**Figure S1.** Germline P lineage cells show prolonged mitotic delays relative to somatic AB lineage cells when spindle formation is perturbed using a temperature sensitive allele of  $\beta$ -tubulin. Related to Figure 1. (A) Representative cropped time points from an AB (top) and P<sub>1</sub> (bottom) cell carrying *tbb-2(or362)* and H2B::mCH and shifted to the restrictive temperature (26°C), showing the timing of nuclear envelop breakdown (NEBD) to the start of chromosome decondensation (DECOND). Scale bar = 5 $\mu$ m. (B) The duration of mitosis in germline P and somatic AB lineage cells from 1 to 16-cell stage embryos with *tbb-2(or362)*-induced spindle perturbations. Germline P lineage cells (red) delay in mitosis for longer than somatic AB cells at the same and later embryonic stages. Black bars represent the mean. Error bars show the 95% confidence interval for the mean. p values were determined by an Anova1 with Tukey-Kramer post-hoc test, ns = p > 0.05, \*\*\* = p < 0.001. See Table S2 for summary statistics.

**Figure S2**

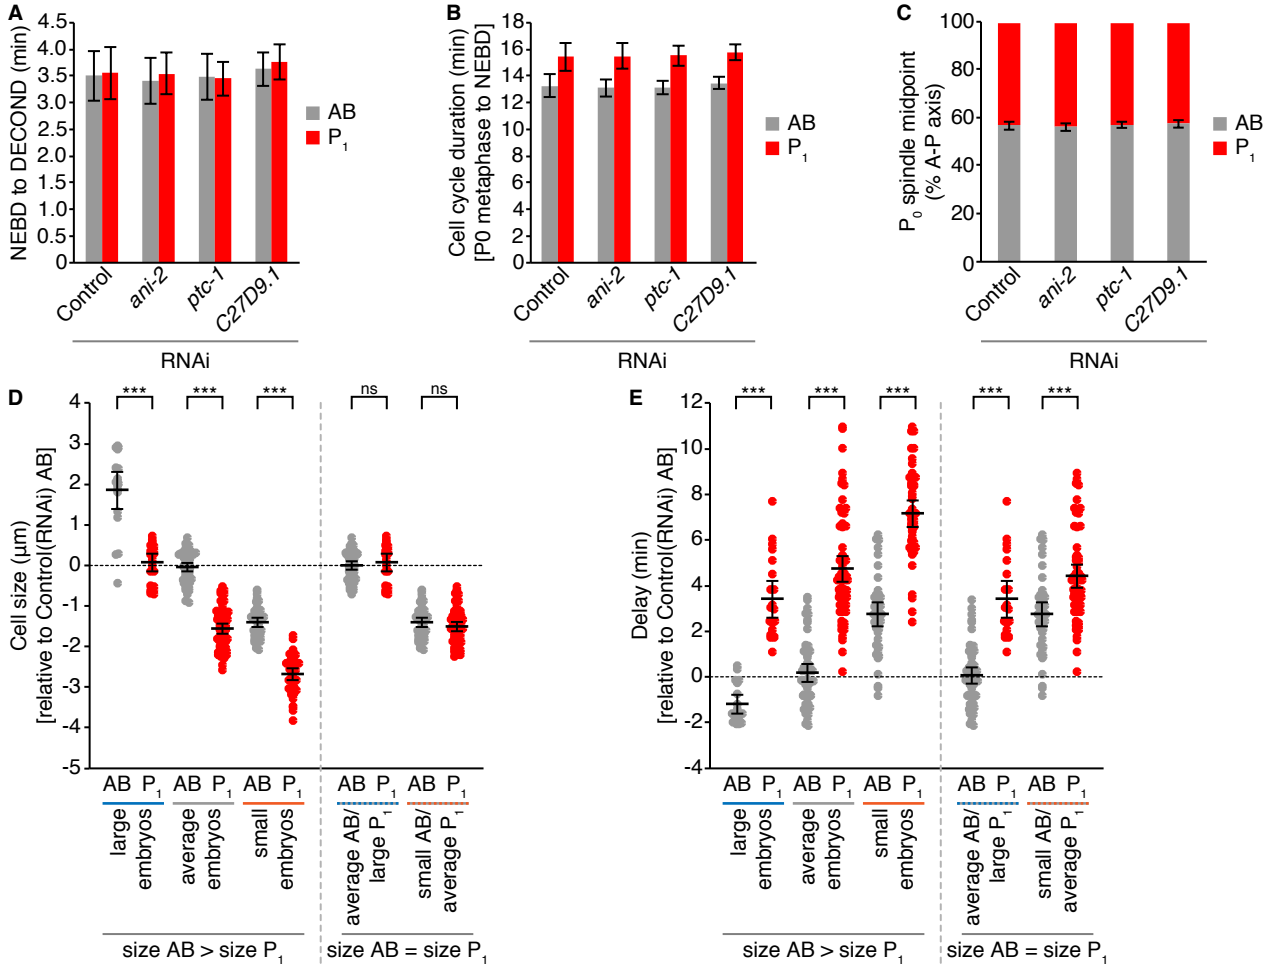

**Figure S2.** Genetic manipulations to vary embryo size do not affect the timing of bipolar divisions, cell cycle asynchrony between AB and P<sub>1</sub> or spindle positioning in P<sub>0</sub> and can be used to compare the duration of monopolar mitoses in comparably-sized AB and P<sub>1</sub> cells. Related to Figure 4. (A and B) Bar graphs showing the mean duration of bipolar mitoses (A) and cell cycle (B) in AB (grey) and P<sub>1</sub> (red) cells following RNAi-induced changes in embryo volume. Error bars represent  $\pm 1$  standard deviation of the mean. (C) Stacked bar graph showing the relative size of AB (grey) and P<sub>1</sub> (red) as inferred from the position of the spindle midpoint in P<sub>0</sub> along the anterior to posterior axis of the embryo. Error bars represent  $\pm 1$  standard deviation of the mean. (D-E) Beeswarm plots showing the measurement data, cell size (D) and delay (E), used in the bootstrap analysis presented in Figure 4, C and D. Black bars represent the mean and error bars show the 95% confidence interval. Data were compared using a 2-sample, 2-tailed t-test. ns =  $p > 0.05$ , \*\*\* =  $p < 0.001$ . See Table S2 for summary statistics.

**Figure S3**

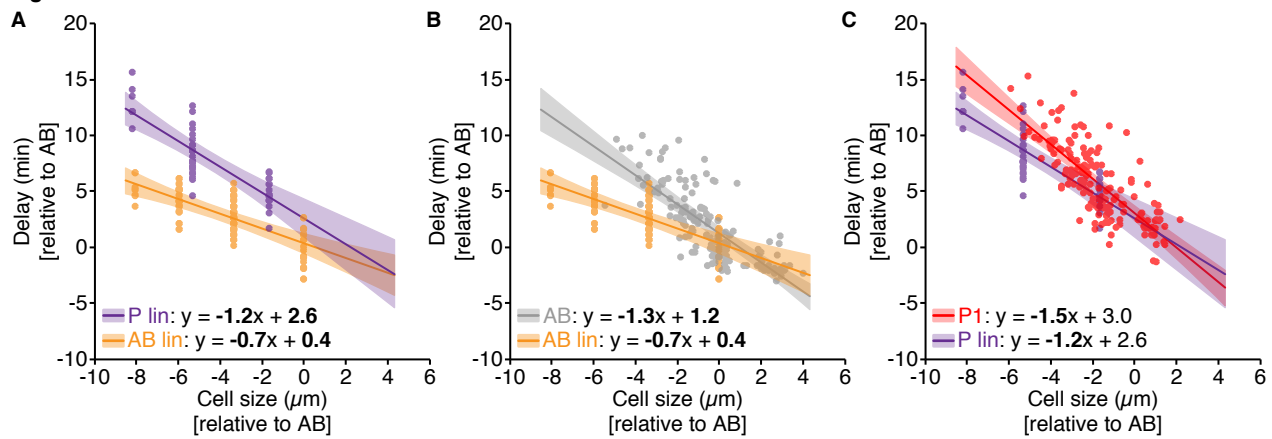

**Figure S3.** Genetically reducing embryo volume produces longer mitotic delays than comparable developmental reductions in cell size. Related to Figures 2 and 4. (A) The duration of monopolar mitoses (delay) in cells from the germline P lineage (red,  $n = 57$ ,  $r = -0.85$ ,  $p = 7.2 \times 10^{-17}$ ) and somatic AB lineage (grey  $n = 131$ ,  $r = -0.74$ ,  $p = 1.6 \times 10^{-23}$ ) in 2- to 16-cell embryos relative to mean cell size. All values are expressed relative to (+/-) the mean value for all AB cells at the 2-cell stage. Mean cell size was calculated as in Figure 4, B. Data are independent from that presented in Figure 2, C. The rate at which delay increases with decreasing cell size is greater in the germline P lineage than in the somatic AB lineage. Statistically different regression coefficients are written in bold and were compared using a non-parametric bootstrap ( $p = 0.013$  for slope and  $p = 0.002$  for intercept). (B-C) The duration of monopolar mitoses (delay) relative to cell size for AB (B) or  $P_1$  (C) cells from 2-cell stage embryos in which embryo size was manipulated by RNAi depletion of ANI-2, PTC-1 and C27D9.1 compared to the same relationship for cells within their respective lineages. Data for cells from the AB and P lineages are reproduced from Figure S3, F. Data for AB and  $P_1$  from small/large 2-cell stage embryos are reproduced from Figure 4, B. Genetic manipulation of embryo volume tends to produce longer mitotic delays than similar cleavage-driven reductions in cell size. Regression coefficients were compared using a non-parametric bootstrap, with significant differences written in bold.  $p = 0$  (slope) and  $p = 5.7 \times 10^{-4}$  (intercept) for AB 2-cell versus AB lineage.  $p = 0.004$  (slope) and  $p = 0.351$  (intercept) for  $P_1$  2-cell versus P lineage. For all panels, lines represent the linear least squares regression fit with 95% confidence interval (shaded regions).

**Figure S4**

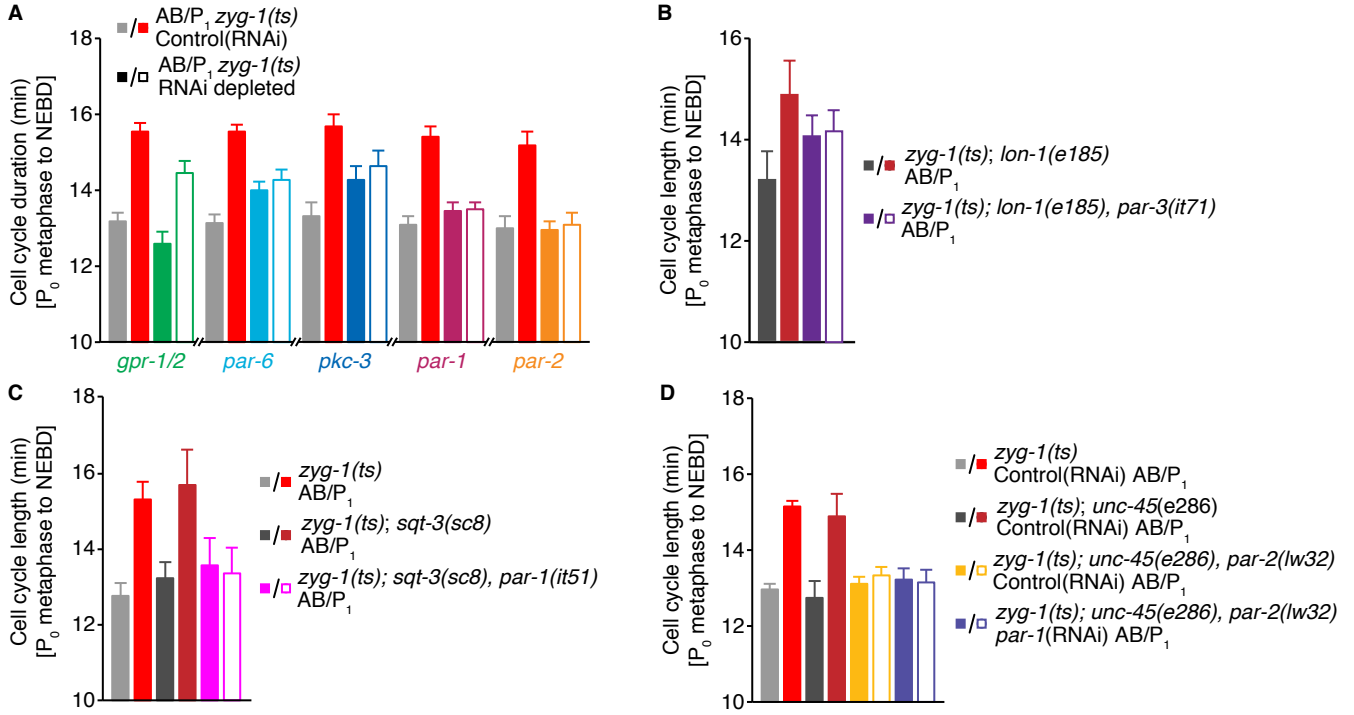



**Figure S4.** AB and P<sub>1</sub> cell cycle durations following RNAi depletion of GPR-1/2 and PAR proteins and in *par-3(it71)*, *par-1(it51)* and *par-2(lw32)* mutants. Related to Figure 5. (A) Cell cycle asynchrony is lost in *par* embryos, with depletion of the posterior PAR proteins, PAR-1 and PAR-2, showing a clear acceleration of cell cycle progression and an AB-like cell cycle duration in P<sub>1</sub>. In our hands, loss of anterior PARs tended to produce an intermediate phenotype, with respect to cell cycle duration, rather than an unambiguous P<sub>1</sub>-like cell cycle duration in both cells. (B) Cell cycle duration for *par-3(it71)* AB and P<sub>1</sub> cells, with their respective controls. Cell cycle asynchrony is lost, and cell cycle duration in *par-3(it71)* AB and P<sub>1</sub> cells is intermediate to that found in control AB and P<sub>1</sub> cells. (C) Cell cycle duration for *par-1(it51)* AB and P<sub>1</sub> cells, with their respective controls. (D) Cell cycle duration for *par-2(lw32)* AB and P<sub>1</sub> cells, with their respective controls. *par-2(lw32)* P<sub>1</sub>, *par-2(lw32)*, *par-1(RNAi)* P<sub>1</sub> and *par-1(it51)* P<sub>1</sub> cells all have accelerated cell cycle durations that resemble control AB cells. For all panels, bar graphs show mean cell cycle length (from metaphase of P<sub>0</sub> to nuclear envelope breakdown of AB or P<sub>1</sub>), with filled bars for AB and open bars for P<sub>1</sub> values. Control AB and P<sub>1</sub> values are shown in grey and red, respectively. Error bars show the 95% confidence interval for the mean.

**Table S1.** *C. elegans* strains used in this study. Related to all figures. All strains, except UM399 (30), were constructed as part of this study using the following: EU782 (*zyg-1(or297) II*), EU858 (*tbb-2(or362) III*), TH27 (*unc-119(ed3) III; ddls6 [tbg-1::GFP, unc-119(+)] V*), UM397 (*mdf-2(tm2190)*, *Itls37[unc-119(+), Ppie-1::mCherry::his-58] IV*), LP271 (*cpls42[mex-5p::mNeonGreen::PLC $\delta$ -PH::tbb-2 3'UTR + unc-119(+)] II*; *unc-119(ed3) III*), UM226 (*Itls37[unc-119(+), Ppie-1::mCherry::his-58] IV*), KK747 (*unc-45(e286)*, *par-2(lw32)/qC1[dpy-19(e1259), glp-1(q339)] III*), KK292 (*sqt-3(sc8)*, *par-1(it51) V/nT1[unc-?(n754) let-?] (IV;V)*), BC8 (*sqt-3(sc8) V*), CB286 (*unc-45(e286) III*), and KK571 (*lon-1(e185)*, *par-3(it71)/qC1 [dpy-19(e1259) glp-1(q339)] III*). LP271 was kindly provided by Drs. D. Dickinson and B. Goldstein. The *mdf-2(tm2190)* allele was received from Dr. A. Golden. **Some strains were provided by the CGC, which is funded by NIH Office of Research Infrastructure Programs (P40 OD010440).**

| Strain # | Genotype                                                                                                                                                                      |
|----------|-------------------------------------------------------------------------------------------------------------------------------------------------------------------------------|
| UM399    | <i>Itls37[unc-119(+), Ppie-1::mCherry::HIS-58] IV; ojs1[unc-119(+), Ppie-1::GFP::tbb-2] V</i>                                                                                 |
| UM471    | <i>zyg-1(or297) II; Itls37[unc-119(+), Ppie-1::mCherry::HIS-58] IV; ojs1[unc-119(+), Ppie-1::GFP::tbb-2] V</i>                                                                |
| UM547    | <i>tbb-2(or362) III; Itls37[unc-119(+), Ppie-1::mCherry::HIS-58] IV; ddls6 [tbg-1::GFP, unc-119(+)] V</i>                                                                     |
| UM525    | <i>zyg-1(or297) II; mdf-2(tm2190), Itls37[unc-119(+), Ppie-1::mCherry::HIS-58] IV; ojs1[unc-119(+), Ppie-1::GFP::tbb-2] V</i>                                                 |
| UM548    | <i>zyg-1(or297) II; Itls37[unc-119(+), Ppie-1::mCherry::HIS-58] IV</i>                                                                                                        |
| UM572    | <i>zyg-1(or297) II; unc-45(e286), par-2(lw32)/qC1[dpy-19(e1259), glp-1(q339)] III; Itls37[unc-119(+), Ppie-1::mCherry::HIS-58] IV; ojs1[unc-119(+), Ppie-1::GFP::tbb-2] V</i> |
| UM573    | <i>zyg-1(or297) II; Itls37[unc-119(+), Ppie-1::mCherry::HIS-58] IV; sqt-3(sc8), par-1(it51) V/nT1[unc-?(n754) let-?] (IV;V)</i>                                               |
| UM628    | <i>zyg-1(or297) II; unc-45(e286) III; Itls37[unc-119(+), Ppie-1::mCherry::HIS-58] IV; ojs1[unc-119(+), Ppie-1::GFP::tbb-2] V</i>                                              |
| UM627    | <i>zyg-1(or297) II; Itls37[unc-119(+), Ppie-1::mCherry::HIS-58] IV; sqt-3(sc8) V</i>                                                                                          |
| UM463    | <i>cpls42[mex-5p::mNeonGreen::PLC<math>\delta</math>-PH::tbb-2 3'UTR, unc-119(+)] II; Itls37[unc-119(+), Ppie-1::mCherry::HIS-58] IV</i>                                      |

|       |                                                                                                                                                                               |
|-------|-------------------------------------------------------------------------------------------------------------------------------------------------------------------------------|
| UM664 | <i>zyg-1(or297) II; lon-1(e185), par-3(it71)/qC1 [dpy-19(e1259) glp-1(q339)] III; ltIs37[unc-119(+), Ppie-1::mCherry::HIS-58] IV; oJIs1[unc-119(+), Ppie-1::GFP::tbb-2] V</i> |
| UM665 | <i>zyg-1(or297) II; lon-1(e185) III; ltIs37[unc-119(+), Ppie-1::mCherry::HIS-58] IV; oJIs1[unc-119(+), Ppie-1::GFP::tbb-2] V</i>                                              |

**Table S2.** Summary statistics. Related to all figures. Summary statistics are provided for all data included in the manuscript text and figures. Data are listed by order of figure. See Materials and Methods for details on data normalization and statistical analyses.  $\bar{x}$  = sample mean. CI = confidence interval. SD = standard deviation.  $\mu$  = population mean.  $\sigma$  = population standard deviation. m = slope. b = intercept. r = Pearson's coefficient. See Experimental Procedures for details.

## **Video Legends**

Videos 1, 2 and 5 were acquired on a Cell Observer SD spinning disc confocal (Zeiss; Yokogawa) equipped with a stage-top incubator (Pecon) set to 26°C, using an AxioCam 506 Mono camera (Zeiss), with 4x4 binning, and a 63x/1.4 NA Plan Apochromat DIC oil immersion objective (Zeiss) in Zen software (Zeiss). Images were acquired every 30 seconds, with the exception of Video 4 (*mdf-1*(RNAi)) which was acquired every 33 seconds. Images were processed using ImageJ (NIH). Maximum intensity projections of 18 z-slices (1µm sectioning) centered on the embryo of interest are shown. All embryos are oriented with anterior to the left. Scale bar = 10µm. Videos 3 and 4 were acquired on a Cell Observer SD spinning disc confocal (Zeiss; Yokogawa) at room temperature (~20°C), using an AxioCam 506 Mono camera (Zeiss), with 3x3 binning, and a 40x/1.4 NA Plan Apochromat DIC (UV) VIS-IR oil immersion objective (Zeiss), in Zen software (Zeiss). Images were acquired every 30.3 seconds for Video 3 and every 45.4 seconds for Video 4. Maximum intensity projections of 5 z-slices (1.5µm sectioning) centered on the nucleus of interest are shown. Scale bar = 5µm. For all Videos, images were adjusted for brightness and contrast and scaled 4 times to adjust for file compression during .avi conversion. For all Videos except 2, H2B::mCH is shown in cyan and β-tubulin::GFP is shown in red. For Video 2, H2B::mCH is shown in cyan and γ-tubulin::GFP is shown in red. Time stamp is in min:sec. Videos play at 4 frames per second.

**Video S1. *zyg-1(ts)*-induced monopolar spindles in 2- and 4-cell stage embryos.**

**Video S2. *tbb-2(ts)*-induced spindle defects in 2- and 4-cell stage embryos.**

**Video S3. A P<sub>2</sub> cell from a permeabilized embryo treated with DMSO.**

**Video S4. A P<sub>2</sub> cell from a permeabilized embryo treated with 33µM Nocodazole.**

**Video S5. *zyg-1(ts)*-induced monopolar spindles in 2- and 4-cell stage embryos following RNAi depletion of MDF-1.**
